# Supplementary material for: Genome scale metabolic model driven strategy to delineate host response to Mycobacterium tuberculosis infection
Source: Royal Society of Chemistry journal article supplement (doi:10.1039/d0mo00138d), 2021-01-20
Supplement: d0mo00138d1.pdf [file d0mo00138d1.pdf]

Supplementary file: DF1

Table with 4 main columns: ra6-ja46, ra18-ja18, ra30-ja30, and ra42-ja42. Each column contains reaction IDs, names, original coefficients, and correlation coefficients. The table lists various biochemical reactions such as ATP hydrolysis, kinase activities, and transport processes across different cellular compartments.
