# Supplementary material for: Genome scale metabolic model driven strategy to delineate host response to Mycobacterium tuberculosis infection
Source: Royal Society of Chemistry journal article supplement (doi:10.1039/d0mo00138d), 2021-01-20
Supplement: d0mo00138d2.pdf [file d0mo00138d2.pdf]

Supplementary file: DF2

| Module Combination               | RA6-RV6      | RA6-BND6     | RA6-JAL6     | RA18-RV18    | RA18-BND18  | RA18-JAL18   | RA30-RV30    | RA30-BND30   | RA30-JAL30   | RA42-RV42    | RA42-BND42   | RA42-JAL42   | MEAN        |
|----------------------------------|--------------|--------------|--------------|--------------|-------------|--------------|--------------|--------------|--------------|--------------|--------------|--------------|-------------|
| M1-M2                            | 0.619778709  | 0.858169561  | 0.721859588  | 0.378659588  | 0.554778829 | 0.180789402  | 0.156887828  | 0.372801603  | 0.26571142   | 0.179974303  | 0.58167773   | 0.404918321  | 0.432227743 |
| M1-M3                            | 0.507109295  | 0.607977845  | 0.536083345  | 0.617759665  | 0.411516944 | 0.361842882  | 0.088942496  | 0.273849376  | 0.423600448  | 0.094394254  | -0.073281126 | 0.477108853  | 0.356504973 |
| M1-M4                            | 0.370012869  | 0.558859799  | 0.643657971  | 0.30087012   | 0.527743861 | 0.188767384  | 0.216059297  | 0.622260933  | 0.421792439  | 0.815863933  | 0.43039305   | 0.283734519  | 0.429798369 |
| M1-M5                            | 0.450811122  | 0.313473366  | 0.455547185  | 0.563890526  | 0.347127942 | 0.271354154  | -0.037615184 | 0.30290483   | 0.290322724  | 0.652965947  | -0.03362953  | 0.044436991  | 0.304005485 |
| M1-M6                            | 0.388839765  | 0.560961812  | 0.484276556  | 0.532762291  | 0.612360032 | 0.31884672   | 0.53215253   | 0.205923644  | 0.470461605  | 0.088233607  | 0.302466245  | 0.25761068   | 0.379679436 |
| M1-M7                            | 0.504991018  | 0.581698963  | 0.781928229  | 0.557575545  | 0.331482172 | 0.239851891  | 0.577895878  | 0.59790655   | 0.513140291  | 0.889169976  | -0.120957506 | 0.066898534  | 0.439247574 |
| M2-M3                            | 0.445636073  | 0.496200569  | 0.316704094  | 0.791514665  | 0.75759302  | 0.146969322  | 0.215334259  | 0.716618755  | 0.32774476   | 0.344911082  | 0.561442514  | 0.764321882  | 0.477202759 |
| M2-M4                            | 0.254529815  | 0.308510472  | 0.225054313  | 0.692989984  | 0.604112811 | -0.069854115 | 0.619968852  | 0.644617904  | 0.399661303  | 0.628997198  | 0.350607618  | 0.374734411  | 0.417011999 |
| M2-M5                            | 0.298751103  | 0.280295554  | 0.23820446   | 0.301606969  | 0.447718132 | 0.044603141  | 0.296989635  | 0.391477309  | 0.424459955  | 0.18476658   | 0.378917044  | 0.136192833  | 0.283643538 |
| M2-M6                            | 0.189703164  | 0.136304917  | 0.200995716  | 0.236746397  | 0.393631529 | 0.024887117  | 0.26317634   | 0.328004059  | 0.407485274  | 0.631784938  | 0.03676083   | 0.44903108   | 0.273249462 |
| M2-M7                            | 0.297609097  | 0.303273079  | 0.188068775  | 0.388879845  | 0.469297331 | 0.064596879  | 0.865263207  | 0.255948698  | 0.595592932  | 0.852433953  | 0.001554068  | 0.382616237  | 0.386460813 |
| M3-M4                            | 0.20029133   | 0.190273133  | 0.14023775   | 0.455077339  | 0.506708951 | 0.441667454  | 0.371152065  | 0.47441014   | 0.50360464   | 0.590769412  | 0.433643054  | 0.753964698  | 0.419320707 |
| M3-M5                            | 0.296438881  | 0.211296272  | 0.102253255  | 0.792391694  | 0.16175258  | 0.370859267  | 0.447979415  | 0.625072241  | 0.17217874   | 0.924703037  | -0.053800433 | 0.445109081  | 0.372469091 |
| M3-M6                            | 0.236419899  | 0.288206436  | 0.111330075  | 0.374004449  | 0.258146055 | 0.417360854  | 0.237397805  | 0.285688168  | 0.37466075   | 0.775099186  | -0.099590817 | 0.71876263   | 0.329495839 |
| M3-M7                            | 0.333280664  | 0.285594788  | 0.337278885  | 0.356840063  | 0.568915887 | 0.262353371  | 0.622796031  | 0.592907485  | 0.518006864  | 0.257509185  | 0.6636889    | 0.335146955  | 0.425328208 |
| M4-M5                            | 0.126432168  | 0.133293479  | 0.052595218  | 0.530015746  | 0.456110387 | 0.144554339  | 0.453468129  | 0.60245311   | 0.316076486  | 0.630560062  | 0.38000789   | 0.375758837  | 0.348038828 |
| M4-M6                            | -0.016204776 | 0.164699645  | 0.14890833   | 0.525781636  | 0.520725868 | 0.248705054  | 0.34348567   | 0.452925613  | 0.544655381  | 0.672574441  | 0.195489808  | 0.307885989  | 0.340442942 |
| M4-M7                            | 0.177620104  | 0.137687988  | 0.169065083  | 0.555885847  | 0.701236234 | 0.159781003  | 0.596114517  | 0.523274061  | 0.494132151  | 0.735155776  | 0.299244547  | 0.300449596  | 0.401745898 |
| M5-M6                            | 0.041573742  | -0.123082678 | 0.056393627  | 0.443610028  | 0.349361406 | 0.13571947   | 0.028768299  | 0.623306062  | 0.010440751  | 0.51169128   | 0.340677216  | 0.025832382  | 0.202485693 |
| M5-M7                            | 0.100154095  | -0.206217406 | 0.254448973  | 0.302706303  | 0.635792558 | 0.072163117  | 0.297844185  | 0.646929725  | 0.176850639  | 0.836728432  | -0.055226705 | 0.374865522  | 0.284725161 |
| M6-M7                            | 0.143290632  | -0.142456945 | 0.195435555  | 0.328730395  | 0.313566892 | 0.066014184  | 0.22296811   | 0.353483366  | 0.194010193  | 0.744197545  | 0.315729888  | -0.003949415 | 0.226238376 |
| ORIGINALCORRELATION COEFFICIENTS | -0.247578555 | -0.274640746 | -0.208954705 | -0.213613798 | 0.120666144 | -0.208954705 | -0.11122538  | -0.208954705 | -0.208954705 | -0.274640746 | -0.028126389 | -0.028126389 | -0.157      |

Supplementary file: DF2

| Module                           | RA6-RV6      | RA6-BND6     | RA6-JAL6     | RA18-RV18    | RA18-BND18  | RA18-JAL18   | RA30-RV30    | RA30-BND30   | RA30-JAL30   | RA42-RV42    | RA42-BND42   | RA6-JAL6     | MEAN      |
|----------------------------------|--------------|--------------|--------------|--------------|-------------|--------------|--------------|--------------|--------------|--------------|--------------|--------------|-----------|
| M1                               | 0.374850422  | 0.548798024  | 0.518530218  | 0.085637129  | 0.578194756 | 0.431302018  | 0.318052282  | 0.176632374  | 0.139866124  | 0.64248636   | -0.029307346 | 0.330402952  | 0.3429538 |
| M2                               | 0.278408831  | 0.142030871  | 0.145023755  | 0.382304662  | 0.259071461 | -0.035910507 | 0.709124791  | 0.34809535   | 0.184113631  | 0.831552237  | 0.086347085  | 0.361762294  | 0.3058399 |
| M3                               | 0.166847326  | 0.220944483  | 0.004464832  | 0.242819682  | 0.177985825 | 0.313167669  | -0.212833052 | 0.281710816  | 0.119834746  | 0.10468262   | 0.411152611  | 0.657573947  | 0.2061356 |
| M4                               | 0.060031488  | 0.147670502  | 0.062996915  | 0.316195977  | 0.587273481 | 0.208756066  | 0.326254372  | 0.507819039  | 0.475901244  | 0.651014888  | 0.363101798  | 0.25875908   | 0.3285257 |
| M5                               | 0.020713517  | 0.113695182  | 0.129309353  | 0.637263088  | 0.176551201 | 0.294356352  | 0.118344429  | 0.599963704  | 0.146926493  | 0.041722831  | -0.04727449  | -0.060325517 | 0.1798665 |
| M6                               | 0.05397213   | -0.087672865 | 0.082812309  | 0.141671543  | 0.546089937 | 0.197969379  | 0.019936313  | 0.195055635  | 0.446196899  | 0.197421011  | 0.216585426  | 0.253605352  | 0.1875207 |
| M7                               | 0.114934415  | 0.047817166  | 0.255382913  | 0.560752684  | 0.60901947  | 0.164159615  | 0.314075997  | 0.28744927   | 0.49920219   | 0.75939969   | 0.25537736   | -0.043832354 | 0.3167594 |
| ORIGINALCORRELATION COEFFICIENTS | -0.247578555 | -0.274640746 | -0.208954705 | -0.213613798 | 0.120666144 | -0.208954705 | -0.11122538  | -0.208954705 | -0.208954705 | -0.274640746 | -0.028126389 | -0.028126389 | -0.157    |
