# Supplementary material for: Genome scale metabolic model driven strategy to delineate host response to Mycobacterium tuberculosis infection
Source: Royal Society of Chemistry journal article supplement (doi:10.1039/d0mo00138d), 2021-01-20
Supplement: d0mo00138d4.pdf [file d0mo00138d4.pdf]

Table S1: Biological Processes enriched among high perturbed proteins. Biological process, overlap proteins/total proteins in process, pvalue of overlap.

|     | 6 hrs                                                                                                                                                                                                                                                                                                                                                                                                                                                                                                                                  | 18 hrs                                                                                                                                                                                                                                                                                                                                                                                      | 30 hrs                                                                                                                                                                                                                                                                                                                                                                                                                                                                                          | 42 hrs                                                                                                                                                                                                                                                                                                                                                                                                                                                                                                                                     |
|-----|----------------------------------------------------------------------------------------------------------------------------------------------------------------------------------------------------------------------------------------------------------------------------------------------------------------------------------------------------------------------------------------------------------------------------------------------------------------------------------------------------------------------------------------|---------------------------------------------------------------------------------------------------------------------------------------------------------------------------------------------------------------------------------------------------------------------------------------------------------------------------------------------------------------------------------------------|-------------------------------------------------------------------------------------------------------------------------------------------------------------------------------------------------------------------------------------------------------------------------------------------------------------------------------------------------------------------------------------------------------------------------------------------------------------------------------------------------|--------------------------------------------------------------------------------------------------------------------------------------------------------------------------------------------------------------------------------------------------------------------------------------------------------------------------------------------------------------------------------------------------------------------------------------------------------------------------------------------------------------------------------------------|
|     | <p>neutrophil degranulation<br/>86/187, 2.888E-28</p> <p>mRNA axis splicing, via spliceosome<br/>57/236, 4.1309E-26</p> <p>spliceosomal complex assembly<br/>57/241, 1.3034E-25</p> <p>mRNA trans splicing, via spliceosome<br/>56/233, 1.4758E-25</p> <p>spliceosomal conformational changes to generate catalytic conformation<br/>56/234, 1.8929E-25</p>                                                                                                                                                                            | <p>alternative mRNA splicing, via spliceosome<br/>69/237, 2.93E-35</p> <p>spliceosomalRNP assembly<br/>67/246, 4.03E-35</p> <p>spliceosomal complex assembly<br/>57/241, 1.3034E-25</p> <p>mRNA trans splicing, via spliceosome<br/>65/233, 8.67E-35</p> <p>spliceosomal conformational changes to generate catalytic conformation<br/>65/234, 1.19E-34</p>                                 | <p>alternative mRNA splicing, via spliceosome<br/>54/237, 3.51E-29</p> <p>mRNA axis splicing, via spliceosome<br/>53/236, 2.9E-28</p> <p>mRNA splicing, via spliceosome<br/>54/252, 9.12E-28</p> <p>mRNA trans splicing, via spliceosome<br/>52/233, 1.13E-27</p> <p>spliceosomal conformational changes to generate catalytic conformation<br/>52/234, 1.41E-27</p>                                                                                                                            | <p>neutrophil degranulation<br/>109/187, 3.11E-42</p> <p>alternative mRNA splicing, via spliceosome<br/>70/237, 1.2E-40</p> <p>mRNA trans splicing, via spliceosome<br/>69/233, 3.85E-40</p> <p>spliceosomal complex assembly<br/>70/241, 4.28E-40</p> <p>spliceosomal conformational changes to generate catalytic conformation<br/>69/234, 5.20E-40</p>                                                                                                                                                                                  |
|     | <p>neutrophil degranulation<br/>109/187, 1.67E-42</p> <p>tRNA aminoacylation for protein translation<br/>55/179, 3.04E-29</p> <p>viral RNA editing<br/>42/119, 2.0E-25</p> <p>viral transcription<br/>42/119, 2.0E-25</p> <p>spliceosomal complex assembly<br/>56/241, 4.71E-23</p>                                                                                                                                                                                                                                                    | <p>SRP-dependent cotranslational protein targeting to membrane, docking<br/>68/88, 1.42E-48</p> <p>SRP-dependent cotranslational protein targeting to membrane, translocation<br/>69/92, 5.69E-48</p> <p>SRP-dependent cotranslational protein targeting to membrane<br/>70/100, 2.19E-45</p> <p>viral transcription<br/>71/119, 7.67E-59</p> <p>viral RNA editing<br/>71/119, 7.67E-59</p> | <p>neutrophil degranulation<br/>86/187, 2.888E-28</p> <p>alternative mRNA splicing, via spliceosome<br/>76/237, 2.82E-41</p> <p>mRNA trans splicing, via spliceosome<br/>75/233, 7.13E-41</p> <p>spliceosomal conformational changes to generate catalytic conformation<br/>75/234, 1E-40</p> <p>spliceosomal complex disassembly<br/>75/234, 1E-40</p>                                                                                                                                         | <p>SRP-dependent cotranslational protein targeting to membrane, docking<br/>68/88, 9.92E-74</p> <p>SRP-dependent cotranslational protein targeting to membrane, translocation<br/>69/92, 3.40E-73</p> <p>SRP-dependent cotranslational protein targeting to membrane, signal sequence recognition<br/>69/102, 5.09E-68</p> <p>SRP-dependent cotranslational protein targeting to membrane<br/>68/100, 2.70E-67</p> <p>SRP-dependent cotranslational protein targeting to membrane, signal sequence processing<br/>68/108, 8.96E-61</p>     |
|     | <p>neutrophil degranulation<br/>99/487, 6.97E-43</p> <p>alternative mRNA splicing, via spliceosome<br/>9/237, 1.07E-24</p> <p>spliceosomalRNP assembly<br/>60/246, 1.37E-24</p> <p>mRNA trans splicing, via spliceosome<br/>58/233, 2.7E-24</p> <p>spliceosomal complex assembly<br/>59/241, 2.75E-24</p>                                                                                                                                                                                                                              | <p>tRNA aminoacylation for protein translation<br/>74/179, 1.02E-43</p> <p>neutrophil degranulation<br/>121/187, 1.44E-43</p> <p>viral transcription<br/>61/119, 4.11E-43</p> <p>viral RNA editing, 61/119<br/>4.11E-43</p> <p>alternative mRNA splicing, via spliceosome<br/>89/237, 1.8E-39</p>                                                                                           | <p>alternative mRNA splicing, via spliceosome<br/>64/237, 8.06E-36</p> <p>spliceosomal complex assembly<br/>64/241, 2.42E-35</p> <p>mRNA trans splicing, via spliceosome<br/>63/233, 2.63E-35</p> <p>spliceosomal conformational changes to generate catalytic conformation<br/>63/234, 3.45E-35</p> <p>spliceosomal complex disassembly<br/>63/234, 3.45E-35</p>                                                                                                                               | <p>SRP-dependent cotranslational protein targeting to membrane, signal sequence recognition<br/>70/102, 3.79E-71</p> <p>SRP-dependent cotranslational protein targeting to membrane, docking<br/>69/88, 3.7891E-71</p> <p>SRP-dependent cotranslational protein targeting to membrane, translocation<br/>70/92, 1.68E-70</p> <p>SRP-dependent cotranslational protein targeting to membrane<br/>70/100, 3.38E-66</p> <p>SRP-dependent cotranslational protein targeting to membrane, signal sequence processing<br/>69/108, 5.9000E-61</p> |
|     | <p>SRP-dependent cotranslational protein targeting to membrane, docking<br/>64/88, 7.46E-59</p> <p>SRP-dependent cotranslational protein targeting to membrane, translocation<br/>64/92, 3.08E-57</p> <p>SRP-dependent cotranslational protein targeting to membrane<br/>65/100, 1.05E-54</p> <p>SRP-dependent cotranslational protein targeting to membrane, signal sequence recognition<br/>65/102, 7.28E-54</p> <p>SRP-dependent cotranslational protein targeting to membrane, signal sequence processing<br/>65/108, 1.06E-51</p> | <p>SRP-dependent cotranslational protein targeting to membrane, docking<br/>136/187, 1.29E-40</p> <p>alternative mRNA splicing, via spliceosome<br/>99/237, 8.04E-39</p> <p>spliceosomalRNP assembly<br/>91/236, 3.59E-38</p> <p>mRNA axis splicing, via spliceosome<br/>89/236, 4.35E-38</p> <p>mRNA trans splicing, via spliceosome<br/>88/233, 9.91E-38</p>                              | <p>SRP-dependent cotranslational protein targeting to membrane, docking<br/>64/88, 8.76E-59</p> <p>SRP-dependent cotranslational protein targeting to membrane, translocation<br/>65/92, 2.47E-58</p> <p>nucleol-transcribed mRNA catabolic process, 5'-3' exomecyclic nonsense-mediated decay<br/>70/111, 2.12E-57</p> <p>nucleol-transcribed mRNA catabolic process, nonsense-mediated decay<br/>73/125, 2.43E-56</p> <p>tRNA aminoacylation for protein translation<br/>81/179, 2.48E-54</p> | <p>SRP-dependent cotranslational protein targeting to membrane, signal sequence recognition<br/>70/102, 3.79E-71</p> <p>SRP-dependent cotranslational protein targeting to membrane, docking<br/>69/88, 3.7891E-71</p> <p>SRP-dependent cotranslational protein targeting to membrane, translocation<br/>70/92, 1.68E-70</p> <p>SRP-dependent cotranslational protein targeting to membrane<br/>70/100, 3.38E-66</p> <p>SRP-dependent cotranslational protein targeting to membrane, signal sequence processing<br/>69/108, 5.9000E-61</p> |
| JAL |                                                                                                                                                                                                                                                                                                                                                                                                                                                                                                                                        |                                                                                                                                                                                                                                                                                                                                                                                             |                                                                                                                                                                                                                                                                                                                                                                                                                                                                                                 |                                                                                                                                                                                                                                                                                                                                                                                                                                                                                                                                            |

Table S2: Metabolic pathways enriched among reactions present in GSMs. Biological process, overlap proteins/total proteins in process, pvalue of overlap.

|       | 6 hrs                                                                                                                                                                                                                                     | 18 hrs                                                                                                                                                                                                                 | 30 hrs                                                                                                                                                                                                                        | 42 hrs                                                                                                                                                                                                        |
|-------|-------------------------------------------------------------------------------------------------------------------------------------------------------------------------------------------------------------------------------------------|------------------------------------------------------------------------------------------------------------------------------------------------------------------------------------------------------------------------|-------------------------------------------------------------------------------------------------------------------------------------------------------------------------------------------------------------------------------|---------------------------------------------------------------------------------------------------------------------------------------------------------------------------------------------------------------|
| H37Ra | Fatty acid activation,24/37,1.34E-21<br>Keratan sulfate biosynthesis,20/59,3.10E-11<br>Citric Acid Cycle,9/17,1.05E-07<br>Oxidative Phosphorylation,5/6,3.72E-06<br>Keratan sulfate degradation,15/75,1.54E-05                            | Fatty acid oxidation,27/29,3.46E-32<br>Fatty acid activation,25/37,3.44E-23<br>Fatty acid oxidation, peroxisome,17/19,8.58E-20<br>Keratan sulfate degradation,25/75,1.27E-13<br>Transport, Extracellular,5/51,1.23E-09 | Fatty acid oxidation,27/29,4.87E-34<br>Fatty acid activation,25/37,7.41E-25<br>Transport, Extracellular,5/51,1.15E-07<br>Keratan sulfate degradation,14/75,1.21E-05<br>Fatty acid elongation,7/25,0.000142                    | Nucleotides,51/167,2.33E-22<br>Fatty acid oxidation, peroxisome,18/19,6.47E-21<br>Carnitine shuttle,33/107,8.75E-15<br>Keratan sulfate biosynthesis,20/59,3.23E-10<br>Transport, Extracellular,17/51,0.000202 |
| H37RV | Fatty acid oxidation, peroxisome,18/19,7.64E-22<br>Pyruvate Metabolism,12/31,6.69E-08<br>Nucleotides,26/167,2.45E-06<br>Keratan sulfate degradation,15/75,1.81E-05<br>Valine, Leucine, and Isoleucine Metabolism,9/30,3.24E-05            | Pyrimidine Biosynthesis,2/8,0.00145<br>Limonene and pinene degradation,2/9,0.001851<br>beta-Alanine metabolism,2/11,0.002789<br>Tryptophan metabolism,3/44,0.003771<br>Triacylglycerol Synthesis,2/13,0.003901         | Fatty acid oxidation,27/29,1.85E-35<br>Keratan sulfate degradation,31/75,2.10E-23<br>Chondroitin sulfate degradation,17/44,1.23E-12<br>Fatty acid elongation,7/25,7.07E-05<br>C5-Branched dibasic acid metabolism,4/8,0.00023 | Carnitine shuttle,33/107,4.54E-33<br>Pyrimidine Biosynthesis,3/8,0.000393<br>Vitamin B6 Metabolism,3/9,0.000578<br>Nucleotides,8/167,0.011902<br>Limonene and pinene degradation,2/9,0.012432                 |
| BND   | Fatty acid activation,24/37,1.34E-21<br>Citric Acid Cycle,9/17,1.05E-07<br>Transport, Extracellular,11/51,1.20E-05<br>Glycine, Serine, and Threonine Metabolism,9/30,2.91E-05<br>Valine, Leucine, and Isoleucine Metabolism,9/30,2.91E-05 | Fatty acid oxidation,27/29,2.61E-35<br>Keratan sulfate degradation,31/75,3.07E-23<br>Chondroitin sulfate degradation,22/44,6.39E-19<br>Pyrimidine Biosynthesis,6/8,2.07E-07<br>Transport, Extracellular,6/51,1.493E-06 | Fatty acid oxidation,28/29,7.50E-36<br>Keratan sulfate biosynthesis,20/59,4.72E-12<br>Transport, Extracellular,5/51,3.21E-08<br>Valine, Leucine, and Isoleucine Metabolism,8/30,9.92E-05<br>Citric Acid Cycle,6/17,0.000141   | Fatty acid oxidation, peroxisome,18/19,3.35E-27<br>Carnitine shuttle,33/107,9.53E-26<br>Pyrimidine Biosynthesis,3/8,0.001395<br>Starch and Sucrose Metabolism,4/21,0.003129<br>Nucleotides,10/167,0.019321    |
| JAL   | Fatty acid activation,24/37,1.16E-27<br>Keratan sulfate biosynthesis,20/59,6.76E-16<br>Purine Catabolism,5/11,1.52E-05<br>Salvage Pathway,3/3,3.73E-05<br>Pyruvate Metabolism,7/31,5.02E-05                                               | Nucleotides,78/167,1.08E-38<br>Fatty acid oxidation,27/29,2.37E-26<br>Fatty acid oxidation, peroxisome,18/19,3.66E-18<br>Vitamin B6 Metabolism,8/9,4.55E-08                                                            | Fatty acid oxidation,27/29,2.96E-37<br>Carnitine shuttle,33/107,3.14E-22<br>Nucleotides,23/167,5.11E-08<br>Pyruvate Metabolism,9/31,1.45E-06<br>Inositol Phosphate Metabolism,8/67,0.003092                                   | Vitamin B6 Metabolism,3/9,0.003241481<br>Galactose metabolism,4/12,0.000637665<br>Fatty acid activation,8/373,66E-05<br>Carnitine shuttle,33/107,3.50E-23<br>Fatty acid oxidation, peroxisome,18/19,8.33E-26  |

Table S3: Metabolic pathways enriched among high flux carrying reactions. Biological process, overlap proteins/total proteins in process, pvalue of overlap.

|       | 6 hrs                                                                                                                                                                                            | 18 hrs                                                                                                                                                                                                                | 30 hrs                                                                                                                                                                                                          | 42 hrs                                                                                                                                                                                                       |
|-------|--------------------------------------------------------------------------------------------------------------------------------------------------------------------------------------------------|-----------------------------------------------------------------------------------------------------------------------------------------------------------------------------------------------------------------------|-----------------------------------------------------------------------------------------------------------------------------------------------------------------------------------------------------------------|--------------------------------------------------------------------------------------------------------------------------------------------------------------------------------------------------------------|
| H37Ra | Transport, Extracellular,144/511,1.30E-49<br>Nucleotides,43/167,2.97E-12<br>Miscellaneous,6/13,0.000303<br>Transport, Endoplasmic Reticular,1/94,0.002202<br>Pyruvate Metabolism,8/31,0.002391   | Transport, Extracellular,137/511,6.50E-41<br>Nucleotides,45/167,8.49E-13<br>Vitamin A Metabolism,13/35,2.95E-06<br>Transport, Mitochondrial,34/189,1.57E-05<br>Transport, Endoplasmic Reticular,1/94,0.001527         | Transport, Extracellular,139/511,1.53E-47<br>Nucleotides,39/167,2.84E-10<br>Vitamin A Metabolism,12/35,8.03E-06<br>C5-Branched dibasic acid metabolism,4/8,0.002091<br>Transport, Mitochondrial,26/189,0.002212 | Transport, Extracellular,136/511,4.39E-48<br>Nucleotides,38/167,2.67E-10<br>Vitamin A Metabolism,11/35,3.06E-05<br>Transport, Mitochondrial,25/189,0.00238<br>Transport, Endoplasmic Reticular,3/94,0.040606 |
| H37RV | Transport, Extracellular,144/511,1.55E-43<br>Nucleotides,48/167,5.37E-14<br>Transport, Mitochondrial,33/189,8.88E-05<br>Vitamin A Metabolism,10/35,0.000639<br>Purine Catabolism,4/11,0.011665   | Transport, Extracellular,149/511,1.58E-46<br>Nucleotides,44/167,2.83E-11<br>Vitamin A Metabolism,13/35,5.68E-06<br>Carnitine shuttle,1/107,0.00029<br>Transport, Mitochondrial,30/189,0.001036                        | Transport, Extracellular,139/511,4.28E-49<br>Nucleotides,33/167,2.75E-07<br>Vitamin A Metabolism,10/35,0.000201<br>Urea cycle/amino group metabolism,7/25,0.002002<br>Transport, Mitochondrial,24/189,0.005814  | Transport, Extracellular,133/511,1.37E-42<br>Nucleotides,40/167,7.21E-11<br>Vitamin A Metabolism,13/35,1.21E-06<br>Transport, Peroxisomal,1/79,0.008553<br>Transport, Mitochondrial,21/189,0.030873          |
| BND   | Transport, Extracellular,136/511,5.75E-40<br>Nucleotides,50/167,4.19E-16<br>Transport, Mitochondrial,33/189,4.01E-05<br>Vitamin A Metabolism,10/35,0.000464<br>Carnitine shuttle,1/107,0.000499  | Transport, Extracellular,142/511,7.31E-47<br>Nucleotides,43/167,5.14E-12<br>Vitamin A Metabolism,13/35,2.08E-06<br>Transport, Endoplasmic Reticular,1/94,0.00195<br>FC5-Branched dibasic acid metabolism,4/8,0.002497 | Transport, Extracellular,155/511,5.98E-58<br>Nucleotides,32/167,4.25E-06<br>Vitamin A Metabolism,12/35,1.36E-05<br>Transport, Peroxisomal,1/79,0.006234<br>Transport, Mitochondrial,25/189,0.007262             | Transport, Extracellular,147/511,3.86E-49<br>Nucleotides,41/167,2.06E-10<br>Vitamin A Metabolism,11/359,37E-05<br>Pyruvate Metabolism,10/31,0.000153<br>Transport, Mitochondrial,25/189,0.009348             |
| JAL   | Transport, Extracellular,147/511,3.86E-49<br>Nucleotides,41/167,2.06E-10<br>Vitamin A Metabolism,11/359,37E-05<br>Pyruvate Metabolism,10/31,0.000153<br>Transport, Mitochondrial,25/189,0.009348 | Transport, Extracellular,145/511,6.27E-42<br>Nucleotides,51/167,2.49E-15<br>Vitamin A Metabolism,13/35,7.29E-06<br>Transport, Mitochondrial,32/189,0.000368<br>Citric Acid Cycle,6/17,0.002948                        | Transport, Extracellular,141/511,6.33E-50<br>Nucleotides,39/167,2.10E-10<br>Vitamin A Metabolism,14/35,1.41E-07<br>Transport, Mitochondrial,24/189,0.006689<br>Purine Catabolism,4/11,0.007423                  | Transport, Extracellular,145/511,1.99E-56<br>D-alanine metabolism,3/3,0.000447<br>Nucleotides,4/167,0.002103<br>Transport, Mitochondrial,25/189,0.002282<br>Vitamin A Metabolism,8/35,0.003137               |

Table S4: Metabolic pathways enriched among virulence specific reactions. Biological process, overlap proteins/total proteins in process, pvalue of overlap.

|       | 6 hrs                                                                                                                                                                                                                                 | 18 hrs                                                                                                                                                                                                                                                         | 30 hrs                                                                                                                                                                                                                                     | 42 hrs                                                                                                                                                                                                                         |
|-------|---------------------------------------------------------------------------------------------------------------------------------------------------------------------------------------------------------------------------------------|----------------------------------------------------------------------------------------------------------------------------------------------------------------------------------------------------------------------------------------------------------------|--------------------------------------------------------------------------------------------------------------------------------------------------------------------------------------------------------------------------------------------|--------------------------------------------------------------------------------------------------------------------------------------------------------------------------------------------------------------------------------|
| H37RV | <p>Transport, Extracellular, 37/511, 9.59E-07</p> <p>Pyruvate Metabolism, 8/31, 4.43E-06</p> <p>Nucleotides, 18/167, 5.05E-06</p> <p>C5-Branched dibasic acid metabolism, 4/8, 7.07E-05</p> <p>Purine Catabolism, 3/11, 0.004506</p>  | <p>Nucleotides, 19/167, 9.14E-09</p> <p>Transport, Mitochondrial, 17/189, 1.75E-06</p> <p>Miscellaneous, 4/13, 0.000198</p> <p>Transport, Nuclear, 6/62, 0.003102</p> <p>Vitamin A Metabolism, 4/35, 0.008545</p>                                              | <p>Miscellaneous, 3/13, 0.001822</p> <p>Citric Acid Cycle, 3/17, 0.004006</p> <p>Transport, Mitochondrial, 9/189, 0.008319</p> <p>C5-Branched dibasic acid metabolism, 2/8, 0.009862</p> <p>Transport, Extracellular, 17/511, 0.011433</p> | <p>Vitamin A Metabolism, 5/35, 1.01E-05</p> <p>Transport, Nuclear, 4/62, 0.001775</p> <p>Miscellaneous, 2/13, 0.005368</p> <p>Nucleotides, 5/167, 0.011414</p> <p>Glycolysis/Gluconeogenesis, 2/31, 0.02753</p>                |
| BND   | <p>Purine Catabolism, 5/11, 4.20E-06</p> <p>Transport, Mitochondrial, 15/189, 6.06E-05</p> <p>Transport, Extracellular, 26/511, 0.000232</p> <p>Transport, Nuclear, 7/62, 0.000807</p> <p>Pyruvate Metabolism, 5/31, 0.000937</p>     | <p>Nucleotides, 21/167, 1.26E-09</p> <p>Transport, Mitochondrial, 16/189, 2.58E-05</p> <p>Vitamin A Metabolism, 6/35, 0.000256</p> <p>Valine, Leucine, and Isoleucine Metabolism, 5/30, 0.000964</p> <p>C5-Branched dibasic acid metabolism, 2/8, 0.017196</p> | <p>Transport, Mitochondrial, 18/189, 2.15E-07</p> <p>Nucleotides, 12/167, 0.00037</p> <p>Transport, Nuclear, 6/62, 0.002648</p> <p>Transport, Extracellular, 20/511, 0.007615</p> <p>Pentose Phosphate Pathway, 2/18, 0.058693</p>         | <p>Nucleotides, 14/167, 4.38E-08</p> <p>Vitamin A Metabolism, 6/35, 7.58E-06</p> <p>Vitamin B6 Metabolism, 3/9, 0.00022</p> <p>Citric Acid Cycle, 3/17, 0.001594</p> <p>C5-Branched dibasic acid metabolism, 2/8, 0.005263</p> |
| JAL   | <p>Nucleotides, 20/167, 1.11E-08</p> <p>Transport, Mitochondrial, 20/189, 9.04E-08</p> <p>Purine Catabolism, 5/11, 5.65E-06</p> <p>Vitamin A Metabolism, 4/35, 0.012308</p> <p>C5-Branched dibasic acid metabolism, 2/8, 0.017829</p> | <p>Nucleotides, 27/167, 3.72E-14</p> <p>Transport, Mitochondrial, 22/189, 7.94E-09</p> <p>Transport, Nuclear, 6/62, 0.006497</p> <p>Arginine and Proline Metabolism, 4/33, 0.011825</p> <p>C5-Branched dibasic acid metabolism, 2/8, 0.019449</p>              | <p>Nucleotides, 21/167, 3.83E-10</p> <p>Transport, Nuclear, 8/62, 0.00012</p> <p>Transport, Mitochondrial, 13/189, 0.00059</p> <p>Transport, Extracellular, 20/511, 0.013815</p> <p>C5-Branched dibasic acid metabolism, 2/8, 0.015355</p> | <p>Nucleotides, 32/167, 5.77E-27</p> <p>Vitamin A Metabolism, 6/35, 2.42E-05</p> <p>Galactose metabolism, 3/12, 0.00099</p> <p>Transport, Nuclear, 4/62, 0.018544</p> <p>NAD Metabolism, 2/23, 0.053907</p>                    |

Table S5: Metabolic pathways enriched clinical strains (BND and JAL) in compare to reference strains (Ra and Rv). Common pathways are presented in this table.

|                                          | 6 hrs                                                                                                                                 | 18 hrs                                                                                                                                                                                                                                                                                                                  | 30 hrs                                                                                                                                              | 42 hrs                                                                                                                                                                                                             |
|------------------------------------------|---------------------------------------------------------------------------------------------------------------------------------------|-------------------------------------------------------------------------------------------------------------------------------------------------------------------------------------------------------------------------------------------------------------------------------------------------------------------------|-----------------------------------------------------------------------------------------------------------------------------------------------------|--------------------------------------------------------------------------------------------------------------------------------------------------------------------------------------------------------------------|
| Common to bnd/ra and bnd/rv              | Biotin Metabolism<br>Sphingolipid Metabolism<br>Transport, Extracellular<br>Tyrosine metabolism                                       | Bile Acid Biosynthesis<br>Biotin Metabolism<br>Glycolysis/Gluconeogenesis<br>Nucleotides<br>'Transport, Extracellular'<br>'Transport, Golgi Apparatus'<br>'Transport, Lysosomal'<br>'Transport, Mitochondrial'<br>'Transport, Peroxisomal'<br>'Tryptophan metabolism'<br>'Tyrosine metabolism'<br>Propanoate Metabolism | 'Glycolysis/Gluconeogenesis'<br>'Transport, Extracellular'<br>'Transport, Mitochondrial'<br>'Tryptophan metabolism'                                 | 'Aminosugar Metabolism'<br>'Glycerophospholipid Metabolism'<br>'Keratan sulfate biosynthesis'<br>'Nucleotides'<br>'Pyruvate Metabolism' 'Taurine and hypotaurine metabolism'<br>'Transport, Endoplasmic Reticular' |
| Common to jal/rv and jal/ra              | 'Aminosugar Metabolism'<br>'R Group Synthesis'<br>'Transport, Extracellular'<br>'Transport, Mitochondrial'<br>'Tryptophan metabolism' | 'Blood Group Biosynthesis'<br>'Fatty Acid Metabolism'<br>'Glycerophospholipid Metabolism'<br>'Glycolysis/Gluconeogenesis'<br>'R Group Synthesis' 'Transport, Endoplasmic Reticular'<br>'Transport, Extracellular'<br>'Transport, Mitochondrial'<br>'Tryptophan metabolism'                                              | 'Blood Group Biosynthesis'<br>'R Group Synthesis'<br>'Transport, Endoplasmic Reticular'<br>'Transport, Extracellular'<br>'Transport, Mitochondrial' | 'Keratan sulfate biosynthesis'<br>'Nucleotides'<br>'Transport, Extracellular'<br>'Transport, Mitochondrial'                                                                                                        |
| Common to bnd/ra, bnd/rv, jal/rv, jal/ra | 'Transport, Extracellular'                                                                                                            | 'Glycolysis/Gluconeogenesis'<br>'Transport, Extracellular'<br>'Transport, Mitochondrial'<br>'Tryptophan metabolism'                                                                                                                                                                                                     | 'Transport, Extracellular'<br>'Transport, Mitochondrial'                                                                                            | 'Bile Acid Biosynthesis'<br>'Keratan sulfate biosynthesis'<br>'Nucleotides'<br>'Transport, Extracellular'<br>'Transport, Mitochondrial'                                                                            |

Table S6: Metabolic pathways enriched among virulence specific modules. Biological process, overlap proteins/total proteins in process, p-value of overlap.

| Module Number (Number of reactions) | Enriched Metabolic Pathways ,overlap reactions/totalreactions in pathway, p-value of overlap                                                                                                            |
|-------------------------------------|---------------------------------------------------------------------------------------------------------------------------------------------------------------------------------------------------------|
| M1 (24)                             | <ul style="list-style-type: none"> <li>Purine Catabolism, 3/11, 3.66E-05</li> <li>Pyrimidine Catabolism, 2/19, 0.006098</li> <li>Nucleotides, 3/167, 0.068765</li> </ul>                                |
| M2 (59)                             | <ul style="list-style-type: none"> <li>Citric Acid Cycle, 4/17, 0.000109</li> <li>Alanine and Aspartate Metabolism, 3/12, 0.000715</li> <li>Glutamate metabolism, 1/12, 0.159288</li> </ul>             |
| M3 (78)                             | <ul style="list-style-type: none"> <li>Nucleotides, 48/167, 1.45E-47</li> <li>Transport, Mitochondrial, 27/189, 1.04E-16</li> <li>Galactose metabolism, 1/12, 0.198922</li> </ul>                       |
| M4 (9)                              | <ul style="list-style-type: none"> <li>Glycerophospholipid Metabolism, 2/51, 0.005979</li> <li>Miscellaneous , 1/13, 0.030473</li> <li>Carnitine shuttle, 1/107, 0.204438</li> </ul>                    |
| M5 (12)                             | <ul style="list-style-type: none"> <li>Vitamin A Metabolism, 9/35, 3.87E-17</li> <li>Arginine and Proline Metabolism, 1/33, 0.096271</li> <li>Transport, Extracellular, 1/511, 0.326085</li> </ul>      |
| M6 (6)                              | <ul style="list-style-type: none"> <li>Arginine and Proline Metabolism, 3/33, 1.22E-05</li> <li>Transport, Mitochondrial, 1/189, 0.234145</li> <li>Transport, Extracellular, 1/511, 0.393578</li> </ul> |
| M7 (14)                             | <ul style="list-style-type: none"> <li>Citric Acid Cycle, 4/17, 2.82E-07</li> <li>Glutamate metabolism, 2/12, 0.000831</li> <li>Folate Metabolism, 1/50, 0.157556</li> </ul>                            |
